# Supplementary material for: Evaluation of Liver Parenchymal Changes in Patients with Reduced Left Ventricular Ejection Fraction Using Cardiac MRI T1 Mapping and Extracellular Volume Fraction
Source: Research Square preprint supplement (doi:10.21203/rs.3.rs-8820335/v1), 2026-02-24
Supplement: Supplementary file 2 [file 99948402b4c07ee5cb0c7dcf.docx]

| **Supplementary Table 1.** Magnetic resonance imaging parameters for cine sequences | |
| --- | --- |
| Parameters | Values |
| Flip angle (degree,°) | 60 |
| Echo time (ms) | 1.8 |
| Repetition time (ms) | 4 |
| Slice thickness (mm) | 8 |
| Matrix | 200x200 |
| Number of excitation | 1 |
| Field of view (mm2) | 480x384 |
